# Supplementary material for: Evolutionary and structural analyses of the NADPH oxidase family in eukaryotes reveal an initial calcium dependency
Source: PubMed Central journal article supplement (PMC9421330; doi:10.1016/j.redox.2022.102436), 2022-08-12
Supplement: mmc1.pdf [file mmc1.pdf]

# **Supplementary Information**

## **Evolutionary and Structural analyses of the NADPH Oxidase Family in Eukaryotes reveal an initial calcium dependency**

Marta Massari<sup>1</sup>, Callum R. Nicoll<sup>1</sup>, Sara Marchese<sup>1</sup>,  
Andrea Mattevi<sup>1,\*</sup> and Maria Laura Mascotti<sup>2, 3,\*</sup>

<sup>1</sup>Department of Biology and Biotechnology Lazzaro Spallanzani, University of Pavia, via Ferrata 9, 27100 Pavia, Italy

<sup>2</sup>Molecular Enzymology, Groningen Biomolecular Sciences and Biotechnology Institute, University of Groningen, Nijenborgh 4, 9747 AG Groningen, The Netherlands

<sup>3</sup>IMIBIO-SL CONICET, Facultad de Química Bioquímica y Farmacia, Universidad Nacional de San Luis, Ejercito de los Andes 950, D5700HHW San Luis, Argentina

\*Correspondence to Andrea Mattevi, [andrea.mattevi@unipv.it](mailto:andrea.mattevi@unipv.it) and Maria Laura Mascotti, [m.l.mascotti@rug.nl](mailto:m.l.mascotti@rug.nl)

### **Supplemental Files**

- *Supplementary\_Eukaryota sequence list*: text file listing all sequences used for the analysis in fasta format.
- *Supplementary\_SIAS*: excel file listing the pairwise sequence identities from the raw multiple sequence alignment.
- *Supplementary Eukarya phylogenetic analysis*: Newick tree format file picturing the phylogenetic analysis of eukaryotic NOXs.

Supplementary Figures and Table

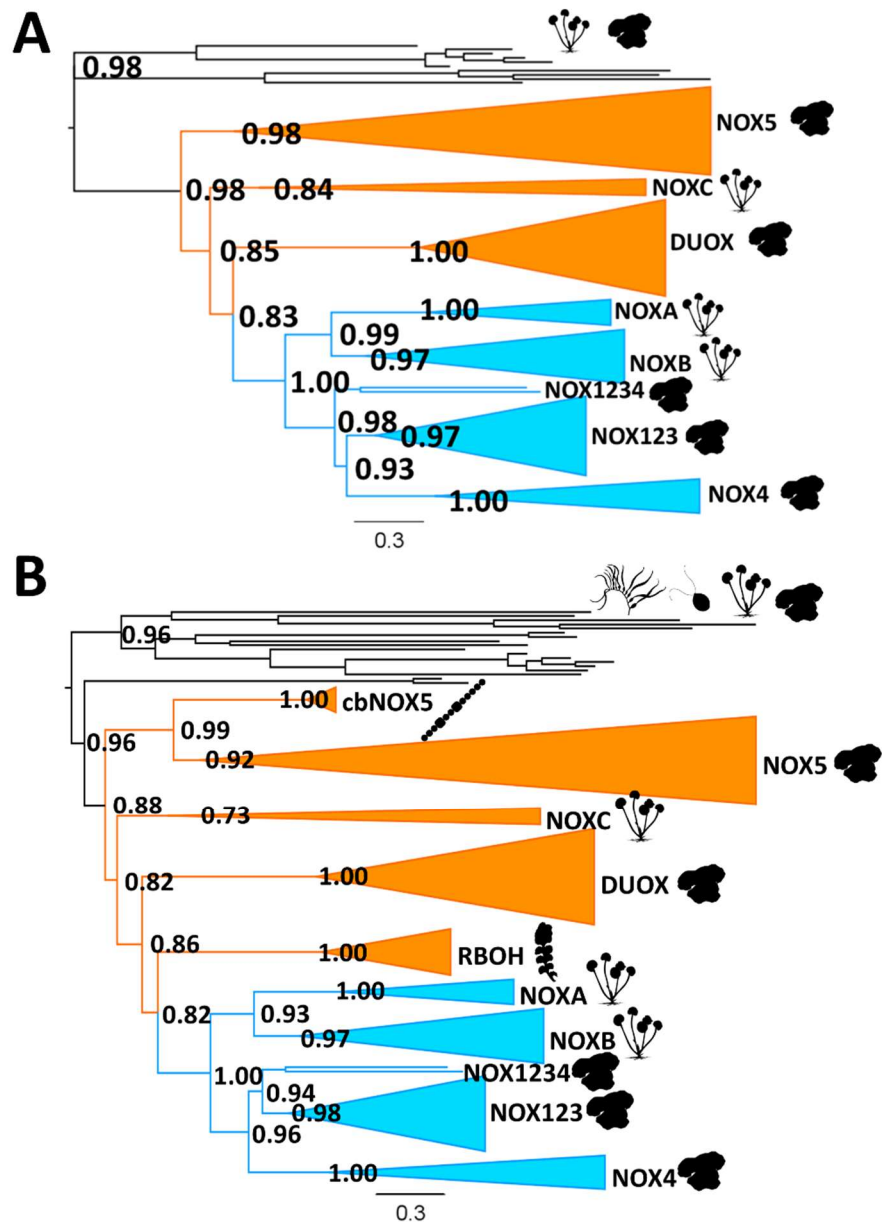

**Figure S1. (A)** Phylogenetic analysis of *Opisthokonta* NOXs by ML inference method. **(B)** Phylogenetic analysis of *Eukarya* NOXs and cyanobacterial NOX5-like sequences by ML inference method. The evolution of the NOX family is shown with orange clades corresponding to calcium-dependent NOXs and cyan clades representing calcium-independent NOXs. Each clade is labelled with their respective type NOX and the organisms (shown as silhouettes) that possess them. Branch supports are shown at key diverging points as transfer bootstrap expectations (TBE). Silhouettes represents: early divergent eukaryotes, Cyanobacteria, Chlorophyta, Streptophyta, Fungi and Metazoa.

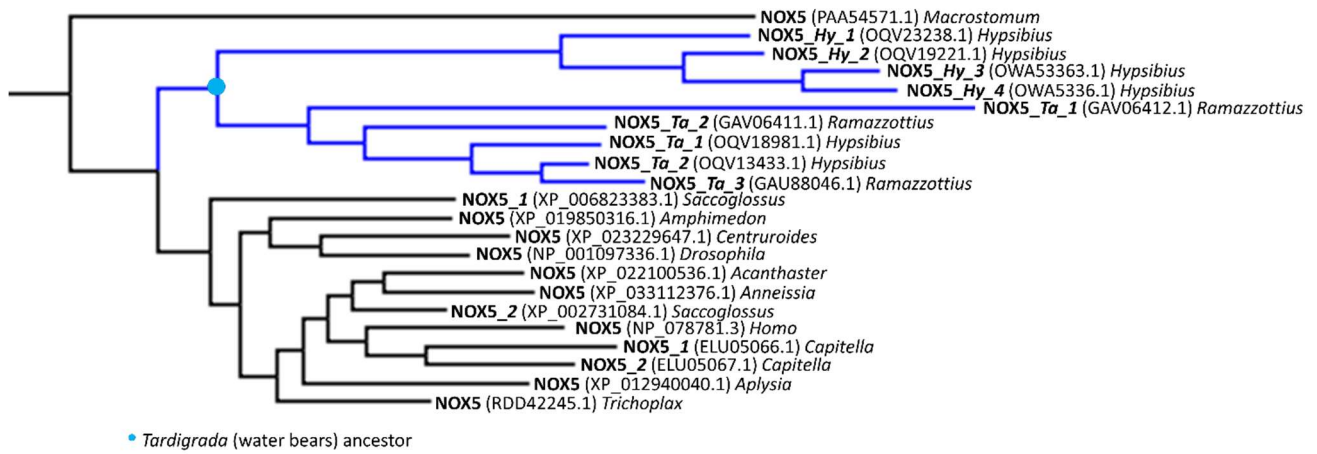

**Figure S2.** *Eukaryota* phylogenetic tree section focused on NOX5.

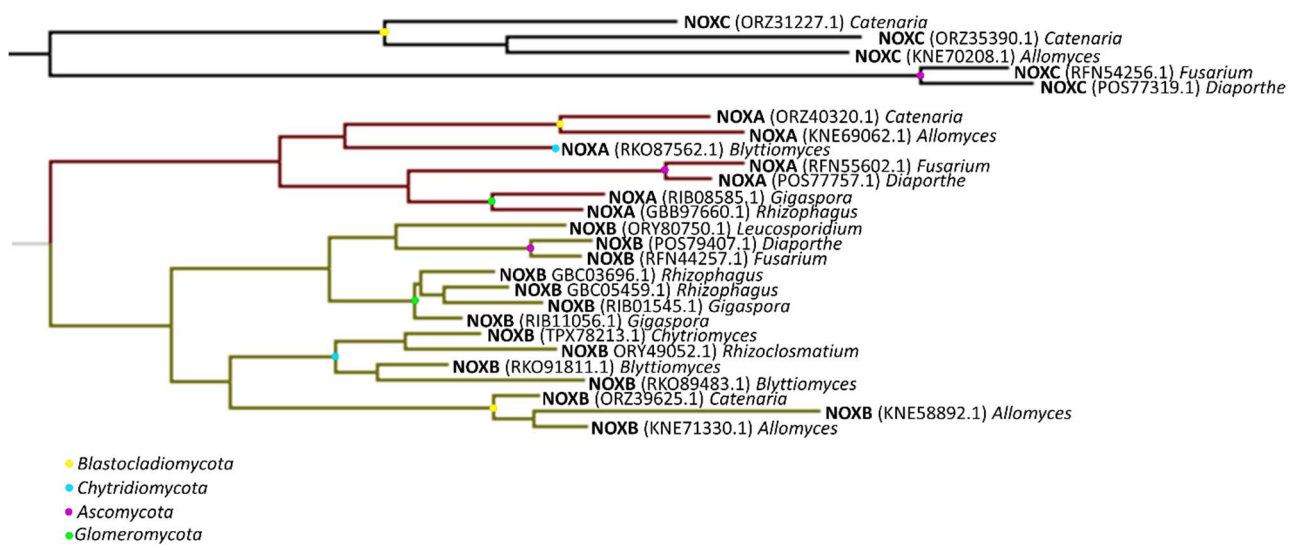

**Figure S3.** *Eukaryota* phylogenetic tree section focused on fungal NOXC (top; black clade) and fungal calcium-independent sequences (bottom; brown clade for NOXA and gold clade for NOXB). *Leucosporidium creatinivorum* NOXB (ORY80750.1, *Basidiomycota*) and *Chytridiomycetes confervae* NOXB (TPX78213.1) sequences were added to enrich the original dataset.

A

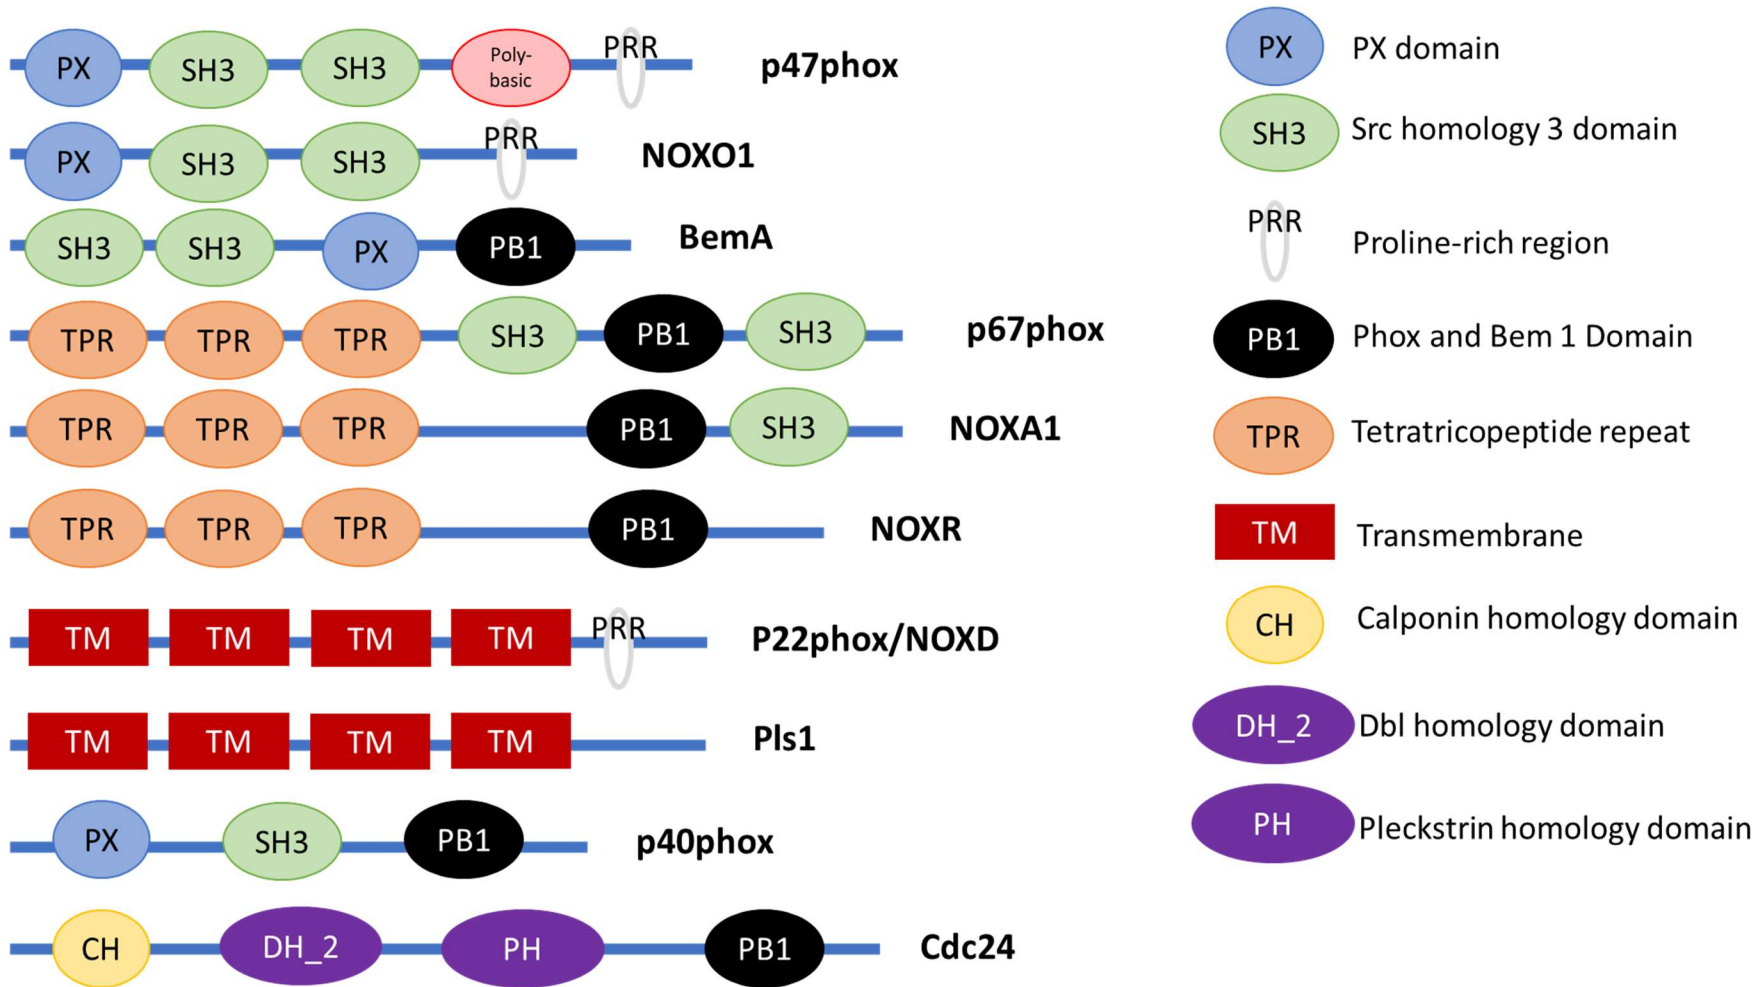

Figure S4.

**B**

| Phylum                            | Species                                         | ORGANIZERS |              |                           | ACTIVATORS                 |              |                   | TRANS-MEMBRANE SUBUNIT |           |           | OTHER REGULATORS |                               |
|-----------------------------------|-------------------------------------------------|------------|--------------|---------------------------|----------------------------|--------------|-------------------|------------------------|-----------|-----------|------------------|-------------------------------|
|                                   |                                                 | NOXO1-like | p47phox-like | BemA-like                 | NOXA1-like                 | p67phox-like | NOXR-like         | p22phox-like           | NOXD-like | Pls1-like | p40phox-like     | Cdc24-like                    |
| <b>Early divergent eukaryotes</b> |                                                 |            |              |                           |                            |              |                   |                        |           |           |                  |                               |
| <i>Phaeophyceae</i>               | <i>Ectocarpus siliculosus</i>                   |            |              |                           |                            |              |                   |                        |           |           |                  |                               |
| <i>Bacillariophyta</i>            | <i>Thalassiosira pseudonana</i><br>CCMP1335     |            |              |                           |                            |              |                   |                        |           |           |                  |                               |
|                                   | <i>Phaeodactylum tricornutum</i><br>CCAP 1055/1 |            |              |                           |                            |              |                   |                        |           |           |                  |                               |
| <b>Viridiplantae</b>              |                                                 |            |              |                           |                            |              |                   |                        |           |           |                  |                               |
| <i>Streptophyta</i>               | <i>Arabidopsis thaliana</i>                     |            |              |                           |                            |              |                   |                        |           |           |                  |                               |
|                                   | <i>Nicotiana tabacum</i>                        |            |              |                           |                            |              |                   |                        |           |           |                  |                               |
| <i>Chlorophyta</i>                | <i>Micromonas commoda</i>                       |            |              |                           |                            |              |                   |                        |           |           |                  |                               |
|                                   | <i>Chlamydomonas reinhardtii</i>                |            |              |                           |                            |              |                   |                        |           |           |                  |                               |
| <b>Fungi</b>                      |                                                 |            |              |                           |                            |              |                   |                        |           |           |                  |                               |
| <i>Blastocladiomycota</i>         | <i>Allomyces macrogynus</i><br>ATCC 38327       |            |              | ✓ (no PB1 domain)         |                            |              | ✓ (+ SH3 domain)  |                        | ✓         |           |                  | ✓ (no CH and PH domains)      |
|                                   | <i>Catenaria anguillulae</i><br>PL171           |            |              | ✓ (no PB1 domain)         |                            |              | ✓ (no TPR domain) |                        |           |           |                  | ✓ (no CH, PH and PB1 domains) |
| <i>Chytridiomycota</i>            | <i>Blyttomyces helicus</i>                      |            |              | ✓ (no PX and PB1 domains) | ✓ (no SH3 and PB1 domains) |              | ✓ (no PB1 domain) |                        | ✓         |           |                  | ✓ (no CH and PB1 domains)     |

|                 |                                 |  |                   |                   |  |  |                            |   |   |   |  |                               |
|-----------------|---------------------------------|--|-------------------|-------------------|--|--|----------------------------|---|---|---|--|-------------------------------|
|                 | <i>Rhizoclosmatium globosum</i> |  |                   |                   |  |  | ✓ (no PB1 domain)          |   | ✓ |   |  | ✓ (no CH, PH and PB1 domains) |
| Ascomycota      | <i>Fusarium fasciculatum</i>    |  |                   |                   |  |  |                            |   |   |   |  |                               |
|                 | <i>Diaporthe helianthi</i>      |  |                   | ✓                 |  |  |                            |   |   | ✓ |  | ✓ (no CH and PH domains)      |
| Glomeromycota   | <i>Rhizophagus clarus</i>       |  |                   | ✓ (no PB1 domain) |  |  | ✓                          |   |   | ✓ |  | ✓ (no CH domain)              |
|                 | <i>Gigaspora rosea</i>          |  |                   | ✓                 |  |  | ✓                          |   |   | ✓ |  | ✓ (no CH domain)              |
| <b>Metazoa</b>  |                                 |  |                   |                   |  |  |                            |   |   |   |  |                               |
| Porifera        | <i>Amphimedon queenslandica</i> |  | ✓                 |                   |  |  | ✓ (no SH3 domain)          |   | ✓ |   |  | ✓ (no PB1 domain)             |
| Placozoa        | <i>Trichoplax adhaerens</i>     |  | ✓ (no SH3 domain) |                   |  |  | ✓ (no PB1 domain)          |   |   |   |  | ✓ (no SH3 and PB1 domains)    |
|                 | <i>Trichoplax sp. H2</i>        |  | ✓                 |                   |  |  | ✓ (no PB1 domain)          | ✓ |   |   |  | ✓ (no SH3 and PB1 domains)    |
| Cnidaria        | <i>Stylophora pistillata</i>    |  | ✓                 |                   |  |  |                            |   | ✓ |   |  | ✓ (no PB1 domain)             |
|                 | <i>Nematostella vectensis</i>   |  | ✓                 |                   |  |  | ✓ (no SH3 and PB1 domains) |   | ✓ |   |  | ✓ (no PB1 domain)             |
| Platyhelminthes | <i>Macrostomum lignano</i>      |  | ✓                 |                   |  |  |                            |   | ✓ |   |  | ✓ (no PB1 domain)             |

|               |                                  |   |   |  |   |                            |                   |   |  |  |                   |  |
|---------------|----------------------------------|---|---|--|---|----------------------------|-------------------|---|--|--|-------------------|--|
| Chordata      | <i>Ciona intestinalis</i>        |   | ✓ |  |   | ✓ (no SH3 and PB1 domains) |                   | ✓ |  |  | ✓ (no PB1 domain) |  |
|               | <i>Homo sapiens</i>              | ✓ | ✓ |  | ✓ | ✓                          |                   | ✓ |  |  | ✓                 |  |
| Hemichordata  | <i>Saccoglossus kowalevskii</i>  |   | ✓ |  |   | ✓ (no PB1 domain)          |                   | ✓ |  |  | ✓                 |  |
| Echinodermata | <i>Acanthaster planci</i>        |   | ✓ |  |   | ✓ (no PB1 domain)          |                   | ✓ |  |  | ✓ (no PB1 domain) |  |
|               | <i>Anneissia japonica</i>        |   | ✓ |  |   | ✓ (no SH3 and PB1 domains) | ✓ (no PB1 domain) | ✓ |  |  | ✓ (no PB1 domain) |  |
| Arthropoda    | <i>Drosophila melanogaster</i>   |   |   |  |   |                            |                   |   |  |  |                   |  |
|               | <i>Centruroides sculpturatus</i> |   |   |  |   |                            |                   |   |  |  |                   |  |
| Tardigrada    | <i>Hypsibius dujardini</i>       |   |   |  |   |                            |                   |   |  |  |                   |  |
|               | <i>Ramazzottius varieornatus</i> |   |   |  |   |                            |                   |   |  |  |                   |  |
| Nematoda      | <i>Caenorhabditis elegans</i>    |   |   |  |   |                            |                   |   |  |  |                   |  |
|               | <i>Trichinella nativa</i>        |   |   |  |   |                            |                   |   |  |  |                   |  |
| Annelida      | <i>Helobdella robusta</i>        |   |   |  |   |                            |                   |   |  |  |                   |  |
|               | <i>Capitella teleta</i>          |   | ✓ |  |   |                            |                   |   |  |  | ✓ (no PB1 domain) |  |
| Mollusca      | <i>Octopus vulgaris</i>          |   |   |  |   |                            |                   |   |  |  |                   |  |
|               | <i>Aplysia californica</i>       |   | ✓ |  |   |                            |                   | ✓ |  |  | ✓ (no PB1 domain) |  |

**Figure S4.** Domain organization (**A**) and distribution among eukaryotic species (**B**) of the proteins regulating the NOXs that do not directly bind calcium. All the species containing NOX1-4, NOXA-B are highlighted in light blue. *Capitella teleta* is exceptional in that it does not own any NOX1-3 or NOX4 but contains a p47/40phox-like sequence. The search was performed using the following reference sequences: human NOXO1 (NP\_751908.1), human p47phox (NP\_000256.4), *Gigaspora rosea* BemA (RIB26013.1), human NOXA1 (NP\_001242996.1), human p67phox (NP\_000424.2), *Gigaspora rosea* NOXR (RIB16941.1), human p22phox (NP\_000092.2), *Allomyces macrogynus* NOXD (KNE56820.1), *Gigaspora rosea* Pls1 (RIB25271.1), human p40phox (NP\_000622.2), *Gigaspora rosea* Cdc24 (RIB18608.1). The listed sequences have at least 30% query cover on BLASTp with one of the reference sequences. The presence of SH3, PB1, PX, TPR, CH, DH\_2, PH domains was verified with the PROSITE tool from Expasy (<https://www.expasy.org>).



**Table S1. Sequences and posterior probabilities (PP) of ancestral reconstructed proteins.**

|                                                                                                                                                                                                                                                                                                                                                                                                                                                                                                                                                                                                                                                                                                                                                                                                                                                                                                                                                                                                                                                                                                                                                                                                                                                                                                                                                                                   |
|-----------------------------------------------------------------------------------------------------------------------------------------------------------------------------------------------------------------------------------------------------------------------------------------------------------------------------------------------------------------------------------------------------------------------------------------------------------------------------------------------------------------------------------------------------------------------------------------------------------------------------------------------------------------------------------------------------------------------------------------------------------------------------------------------------------------------------------------------------------------------------------------------------------------------------------------------------------------------------------------------------------------------------------------------------------------------------------------------------------------------------------------------------------------------------------------------------------------------------------------------------------------------------------------------------------------------------------------------------------------------------------|
| <p><b>&gt;Node 151</b><br/> MAKALNNDWGSVGPLTRKVPSSYADGVYKPAAGAKRPNRPSASNSDRGRRLLPLLRTRHDKNLTSLLFRLGDPRGNENPAIRALGLLFYRHYNYLAELVARQVFSKDRRWITIA<br/> TLQKVLHPEPSTSQLFQLAAMEEELILGMASQLTERDDNVIDELDRGRETPGLLERFKLLHNDASNLGLLEFEFLKGGHGVLEKEVQKELLLSAETDEKWLKWKIEKRF<br/> KEVAEDAQLDREEFABALGMKPPSSLFAERLFSLVKDRSGSISFRELLDALNMLTHGSSDDKLLKLFDMYDVGDRIDREELKQVLRSCMEANGLSLSPEQLDELVNAI<br/> ESLDADGDGEISFEDFKVLLRKYPEELANLSLSAASWLKPKPEKRRKSVPARARKTLLKAYAEKRSRTLTESLKEPEKESRVVTPWRRRLRYLQNHGPKIFVFLVLLNLG<br/> LFVWSFYQYKNSPEYYSLRKIMGYSVAIARGCGSVLNFNCAFILLPMCRNLLTWRSTRNLNRYIPFDKSI TFHKLIGWVIVFVSLVHTVCHLFNFHSLAEDPSADLESLLRR<br/> LPNLTYADALPPKFGYGLFAKSTAGLTGWLVVVVIMFVTSLPFVRRSHYFVFWYTHLLFI PFIVLLILHSGSALVKPPTFWYVAVLVYVLERILRVKCLRLSRYSR<br/> KVTIVKVLELPSNVVLELVMKRPFGFYKPGQYVFINVPAISRFEWHPFTISSCPEDDHLSHIRAVGDWTKKLYELFDENEKEEKLPGDPPDNLQEEETARKLPKPTLSR<br/> KTRRPGKLTLLRLVHVVEYIDGYPGAPSDFFKYEHAVLIGAGIGVTPFASILKDLVHRHKSQRQSCPSANTDWSDDVPGSKMKLRKVDFFWVTRDQKSFWEFADLLNELE<br/> EQQAEEGNLDDFLEIHIYLTSAARGKSDLKSVMLHMALELAHKKNGRDLITGLRSTRTHYGRPDWDKIFEKIAEHNHNSKGVGFYCGPPALAKTLRKACQKYNKKEGTRFEFHK<br/> ENF<br/> <b>PP = 0.60</b></p>                                                                                                                                                                                                                                 |
| <p><b>&gt;Node 152</b><br/> MAKAVPPSYADGVNPNRPSASNGLPSLRNRTTLFVYFGEILPATGPGCPDPSRGGRLPLLRTRHDKNLGLSPIYSTSEAWADALRSFKGGKLAADDGAEFPPEPENTIGLPLAN<br/> PPPATAKLRGNENPAIRASRPLGLLFYRHYNYLAERARQHPDKDRRWITATLQKIILHEWLPFAFLGHLQPSSTSLVPPGTFLRNGACHFRGTLPALRLCRDDNVIDELDR<br/> GRGLPDYPLTNWEDINPLLNNDASNLDPGLGLETESDPPGPLEFLKGGHGVLEKEVQKELLLSAETDEKWLKWKIEKRFKEVAEELKDVDAQLDREEFABALGM<br/> KPSLFAERLFSLVKDRSGSISFRELLDALNMLTHGSSDDKLLKLFDMYDVGDRIDREELKQVLRSCMEANGLSLSPEQLDELVNAIILKSLDADNGEISFEDFKVLLRKY<br/> DADGDGEISFEDFKVLLRKYPEELANLSLSAASWLKPKPEKRRKSVPARARKTLLKAYAEKRSRTLTESLKEPEKESRVVTPWRRRLRYLQNHGPKIFVFLVLLNLG<br/> WVSYQYKNSPEYYSLRKIMGYSVAIARGCAAVLNFNCAFILLPMCRNLLTWRSTRNLNRYIPFDKSI TFHKLIGWVIVFVSLVHTVCHLFNFHSLAEDPTADLESLLRRTY<br/> SDALPPKFGYLLFAKSIPLGTGWLIVLVIMFVTSIPAARRSHFEVFWYTHLLFI PFIVLLILHSGSALVKPPTFWYVAVLVYVLERILRVKCLRLSRYSR<br/> LPSNVVLELVMKRPFGFYKPGQYVFINVPAISRFEWHPFTITSCPEDDYLSVHIRAVGDWTRKLYELFDENEKEEKLPGDPPDNLQEEAVPEPAGGKSGRETARKLPK<br/> TALLRLVNVVEYIDGYPGAPSDFFKYEHAVLIGAGIGVTPFASILKDLVHRHKSQRQSCPSANTDWSDDTSEEPKKEDES GDGAPGSKMKLRKVDFFWVTRDQKSFWEFAD<br/> LLELEEEQAEEGNLDDFLEIHIYLTSAARGKSDLKSVMLHMALELAHKKNGRDLITGLRSTRTHYGRPDWDKIFEKIVEEVLKRAEHPNGSKGVGFYCGPPALAKTLRK<br/> ACQKYNKKEGTRFEFHKENF<br/> <b>PP = 0.59</b></p>                                                                                                            |
| <p><b>&gt;Node 153</b><br/> MARAVPPSYADGVQAGANRPNRPSVSNELFKGPDGLPSLRNRTTLFVFFGEILPATGPGCPDPSRGGRLMPLLRTRIDRNTGLSPNNPDEQLNEVTLWIIYSTSEAWADALR<br/> SFKGGRLAADDGAEFPPEPENTIGLPLANPPPATAKLRGNENPALLAGLFLFYRHYNYLAERARQHPDWSKDRRWITATLQNIILHEWLPFAFLGHLHPSSTSLVPPGTYL<br/> RNGQCHFRGTLPALRLCRDDNVIDELDRGHVFGPLSFSRRDLTLGLPDYPLTNWEDINPLLNNDASNLDPGLGLETESDPPGPLEFLKGGHGVLEKEVQKELLLSAETDEKWLKWKIEKRF<br/> YLLARRRERKQKLLDRARKGAKRSRLKKEESTEEFAALEWLGHEKASRPVEVKGPEATIRVLRNKGELLRTIDLKSLAEVSLLSANKDRPLLLLRIPKEYDLVLRFDNE<br/> EERNKFI EELLEFLKGGHGVLERELQKELLLSAETKEKRLKWIERYFKVAAEAFNLDEDESKKLENAEELKDVDAQLSREEFABALGMKPSLFAERLFSLVKDRN<br/> GSI SFRELLDALNMLTHGSDDKLLKLFDMYDVGDRISREELKQVLRGLMEANGLSLSPEQLDELVNAIILKSLDADNGEISFEDFKVLLRKYPEELANLSLSAASWLKPK<br/> PEKRRKSVPARARKTLLKAYAEKRSRTLTESLKEPEKESRVVTPWRRRLRYLQNHGPRIFVFLVFLVINIGLFWWSFYQYKNSPEYYSLRKIMGYSVAIARGAAVNFNC<br/> ALILLPMCRNLLTWRSTRNLNRYIPFDKHI TFHKVIAWVIVFVTVHTVCHLNFHSLAESPSDLESLLRRTVYSDTLPKFSYLLFAKSIPLGTGWLIVLVIMFVTA<br/> TPAVRRSHFEVFWYTHLLFI VFYVLLILHSGSALIKKPTFWYVAVLVYVLERILRVKCLRLSRYSR<br/> TITSAPEDEYLSVHIRAVGDWTRKLRLELDEDEGEEQPAAVEPVPVGGKSGRETARKFPITYIDGYPGAPSDFFKYEVAVLVGAGIGVTPFASILKDLVHRHKSQRQSKMKL<br/> RKVYVFWVTRDQKSFWEFADLLRELEEQQAEEGNLDDFLEIHIYLTSAYDKSDLRSVMLHMAQEHAHKKNGRDLITGLRSTRTHYGRPDWDKIFEKIREHPNGSKGVGFYCGP<br/> PALAKTLRKACQKFNKKEGEDGTRFEFHKENF<br/> <b>PP = 0.57</b></p> |
| <p><b>&gt;Node 154</b><br/> MSPLTKVPGDKRPNRPSASNELFEGPDGLGSGPGCPGKLLPLLRTRIDRNTGLSPNNPDEQLNEVTLWLRDDNVIDELDEKGVFGLSFSRRDLTLNIMRGINPDLYKE<br/> NPELGLLETEANGPGLFTSIRDQFLRLRDTTEEELEIRSLTGLAYLLARRRERKQKLLDRARKGAKRALRGLRLRFLLSAETKEKRLKWKIEKYFKEVAEEDYLDALQLSR<br/> EEFAEALGMKPSLFAERLFSLVKDRNITKTSISFEELDALLELTHGSDDKLLKLFDMYDVGDRISREELKQVLRSCMEANGLSLSPEQLDELVNAIILKSLDADNGEISFEDFKVLLRKY<br/> KISFEELDALNMLTHGSDDKLLKLFDMYDVGDRISREELKQVLRGLMEANGLSLSPEQLDELVNAIILKSLDADNGEISFEDFKVLLRKYPEELANLSLSAASWLKPK<br/> NFNCALILLPVCNLLTWRSTRNLNRYIPFDKNI TFHKVIAWTIVFVTVHTVCHLNFNLSRAEAPSDESLLVYVSDTQPPKFTYLLFVKTVFGLTGVIMVIVLVIMFT<br/> TATPAVRRSHFEVFWYTHLLFI VFYVLLILHAGAFIKKQWGGPTTMYLVVAVLVYVLERILRVLSRYRKVTIVKVVLPNSVIELOMKKPGFYKPGQYVFINCPAISRF<br/> EWHFPTITSAPEDEYLSVHIRAVGDWTRKLRLELDEDEGEEQLEAVEPVPVGGKSGRETARKFPITYIDGYPGAPSDFFKYEVAVLVGAGIGVTPFASILKDLVHRHKSQRQSKMKL<br/> PMKLRKVYVFWVTRDQKSFWEFADLLQEEQAEEGNLDDFLEIHIYLTSAYDES DARSVMLHMAQELAHKNGRDLITGLRSTRTHYGRPDWDKIFEKIAEKHPGTVKGVFY<br/> CGPPALSKTTLRKACQKFSKKGEDGTRFEFHKENF<br/> <b>PP = 0.61</b></p>                                                                                                                                                                                                                                                                                                             |
| <p><b>&gt;Node 155 - Ancestral Ca<sup>2+</sup>-independent NOX</b><br/> MAKRPSKAAKRVKSPWRFRSFLVNEGPRFLFI IWLVINIGLGFVYTYQYKNSPEYTLRLTLLGYSVAIARGAAAVLNFNFCALILLPVCNLLSRLRSTFLNRYIPFDKNI<br/> TFHKVIAWTIVFVTVHTVCHLNFNLSRAEAPSDESLLVYVSDTQPPKFTYLLFVKTVFGLTGVIMVIVLVIMFT<br/> VCRGPTTWYMLIAPAVLVYVLERILRVFRSRKVTIVKVMHPSNVIEIQMKKPGFYKPGQYVFINCPSISRFEWHPFTLSAPEDDYLSVHIRVVDWTEKLAKLGADEG<br/> ERETARKLPETIDGYPGAPSDFFKYEVAVLVGAGIGVTPFASILKSIWYRHQDNSPMKLRKVYVFWVCRDTSFEWFADLLQEEQAEEGNLDDFLEIHIYLTGGWDENEAR<br/> NIMLHETKNDRDAITGLRSTRTHYGRPNWDKIFEKIAESHPGTNVGVFCGPKALSKTLHKACNKYSKAEDGTRFYHKENF<br/> <b>PP = 0.75</b></p>                                                                                                                                                                                                                                                                                                                                                                                                                                                                                                                                                                                                                                                                                                                                                      |
| <p><b>&gt;Node 156 - Ancestral fungal Ca<sup>2+</sup>-independent NOX</b><br/> MANFKNMVNNEGPRFLFI IWLVINIGLGFVYTYQYKNSPEYTLRLTLLGYSVAIARGAAAVLNFDALILLPVCNLLSRLRSTFLNRYIPFDKNI TFHKVIAWTIVFVTVHTVCHLNFNLSRAEAPSDESLLVYVSDTQPPKFTYLLFVKTVFGLTGVIMVIVLVIMFT<br/> LVHTVAHYFNFYKVAEALSGPATALQLHFVTPGLTGHIMLIVLFLMVTSAATEKVRSHFEVFWYTHLLFI VFVFLCFLFHGAGCFIKSQTNP<br/> LERILLREKGRKRTITTKVMHPSKVIIEIQMKKPSFKYKPGQYVFINCPEISRFEWHPFTLSAPEDDYLSVHIRVVDWTKALAKLGCDEGDEBELEENPKRLEIMIDGP<br/> YGAPSEDVFKYEVAVLVGAGIGVTPFASILKSIWYRHNNPNSPMKLRKVYVFWVCRDTSFEWFQSLQLTLEEQNLDDELEIHIYLTGGLDEBEIKNIMLNDTGNKDAITG<br/> LRSRTHYGRPNWDKIFEKIRDSHPGTNVGVFCGPKALSKTLHKACNKYSAGTRFYHKENF<br/> <b>PP = 0.77</b></p>                                                                                                                                                                                                                                                                                                                                                                                                                                                                                                                                                                                                                                                                                   |
| <p><b>&gt;Node 157 - Ancestral NOXA</b><br/> MAASLFRKEFAPLFFWIFWLAHFGLFVYGFQKRRDDPELRLTNSLGFVSWISRGAGLVAFDSALILLPVCNLLSRLRSTFLNRYIPFDENIFFHKCAVYSMLFFTLVHT<br/> TAHYVNFVVEEQLPAPAWQIHYTTWAGITGHIMLIMLMTYSATHKIRQOSFETFWYTHLLFI VFVFLCFLFHGAGCFIKSQTNP<br/> KCI RQPTITTKVMHPSKVIIEIQDPKPSFKYKPGQYVFINVPEISSEFQWHPFTITSCPEEYVSVHIRLVGDWTKALAKLGCDEGDEGVDPIENPKLPKLRIDGYPGAPAE<br/> DVFKYEVAVLVGAGIGVTPFASILKSIWYRYNRKAPMKLRKVYVFWVCRDTSFEWFQSLQLTLEEQQAEEAAPSGLFEIHIYLTGKLDEDEIQNIVLNDVGNDDYDPLTDLRS<br/> RTHYGRPNWDKIFEKIRDAVLSGRYLPAGEAHPGTNVGVFCGPAALAKTLHKACNKYSAGTRFYHKENF<br/> <b>PP = 0.79</b></p>                                                                                                                                                                                                                                                                                                                                                                                                                                                                                                                                                                                                                                                                                                                                                                           |
| <p><b>&gt;Node 163 - Ancestral NOXB</b><br/> MSNSYNLQKTSQIRLILKPSLEWKEFENMVMNEGPKRFFVFLVILHVLGFAYSYQYKNSPEYTLRLTLLGYSVAIARGAAAVLNFDALILLPVCNLLSRLRSTFLNRYIPFDKNI TFHKVIAWTIVFVTVHTVCHLNFNLSRAEAPSDESLLVYVSDTQPPKFTYLLFVKTVFGLTGVIMVIVLVIMFT<br/> RFIPFDKNI TFHKVIAWTIVFVTVHTVCHLNFNLSRAEAPSDESLLVYVSDTQPPKFTYLLFVKTVFGLTGVIMVIVLVIMFT<br/> DKNPLCRGGPTFWKYVIASGVLYLVERILREKGRKRTYISKVMHPSKVIIEIQIKKPSCTTRAGQYIFINCPESIPFQWHPFTLSAPEDDYLSVHIRVVDWTKAFKAL<br/> GCNFGDEDEANKDRENPKLPEIMIDGYPGASASEDVFKYEVAVLVGAGIGVTPFASILKSIWYRMNHNSPMKLRKVYVFWVCRDTSFEWFQSLQLTLEEQNLDDELEIHIYLTGGLDEBEIKNIMLNDTGNKDAITG<br/> YLTGGLKPFDEIKNIMINDAGGKDAITGLRSTRTHYGRPNWDKIFEKIRDAVLSGRYLPAGEAHPGTNVGVFCGPKALSKTLHKACNKWTDAGEDGTRFYHKENF<br/> <b>PP = 0.78</b></p>                                                                                                                                                                                                                                                                                                                                                                                                                                                                                                                                                                                                                                   |
| <p><b>&gt;Node 176 - Ancestral Metazoan Ca<sup>2+</sup>-independent NOX</b><br/> MAKRFRSFLVNEGPRYLVI IWLVINNVLFVYTYQYKNSPEYTLRLTLLGYSVAIARGAAAVLNFNFCALILLPVCNLLSRLRSTFLNRYIPFDKNI TFHKVIAWTIVFVTVHTVCHLNFNLSRAEAPSDESLLVYVSDTQPPKFTYLLFVKTVFGLTGVIMVIVLVIMFT<br/> CFHTAIIHVVAHCNFERFAESYNSSADELNVRYSNTDPHLLFVKTVPGLTGVIMVIVLIMVTSSTEAARRSHFEVFWYTHLLFI PFIVLLVHGMGCVIKRQTNLDEHNP<br/> VCHNNKTRWGNACKRPPVQFAPSPTTMMVVAVPMVLYLELRLFRKHYRVTIVKVVHPSNVIEIQMKKPGFYKPGQYVFINCPSISRFEWHPFTLSAPEDDYLSV<br/> VHIRVVDWTKALAKLGCDEGDEQERETARKFPITYIDGYPGAPSDFFKYEVAVLVGAGIGVTPFASILKSIWYRHQDNSPMKLRKVYVFWVCRDTSFEWFQSLQLTLEEQNLDDELEIHIYLTGGLDEBEIKNIMLNDTGNKDAITG<br/> EQMQEQNMDFLEIHIYLTGGWDENQARNIMLHDDKDAITGLRSTRTHYGRPNWDKIFEKIAESHPGTNVGVFCGPKALSKTLHKACNKYSAGTRFYHKENF<br/> <b>PP = 0.78</b></p>                                                                                                                                                                                                                                                                                                                                                                                                                                                                                                                                                                                     |
